# Supplementary material
Source: publisher site journal article supplement (https://www.dovepress.com/article/344523)
Supplement: Supplementary file 1 [file get_supplementary_file.php]

**Supplemental data**

**Table S1. Patient characteristics: single versus dual site intrascleral haptic fixation**

| Site of intrascleral haptic fixation | Single | Dual | P value |
| --- | --- | --- | --- |
|  | (n=26) | (n=11) |
| Number of eyes (patients) | 26 (15) | 11 (10) |  |
| Age, y (mean ± SD) | (76.6±13.1) | (81.8±9.7) | 0.257 |
| Males/ females | 5/ 10 | 7/ 3 |  |
| Follow-up period after surgery, m (mean ± SD) | (20.1±5.3) | (23.3±4.4) | 0.094 |
| Timing of recognition of phacodonesis, eyes (%) |  |  |  |
| Preoperative | 13 (50.0) | 3 (27.3) | 0.202 |
| Intraoperative | 13 (50.0) | 8 (72.7) |
| Risk factors for progressive zonular insufficiency (multiple), eyes (%) | |  |  |
| age < 80 y | 13 (50.0) | 5 (45.5) |  |
| advanced nuclear cataract (Emery grade ≥ 4) | 11 (42.3) | 7 (63.6) |  |
| narrow angle and/or poor mydriasis | 14 (53.8) | 2 (18.2) |  |
| diabetes mellitus | 8 (30.8) | 5 (45.5) |  |
| history of glaucoma attack | 6 (23.1) | 2 (18.2) |  |
| pseudoexfoliation | 4 (15.4) | 3 (27.3) |  |
| trauma | 4 (15.4) | 0 |  |
| high myopia | 2 ( 7.7) | 1 ( 9.0) |  |
| iatrogenic surgical zonular damage | 0 | 3 (27.3) |  |
| atopic dermatitis | 2 (7.7) | 0 |  |
| Number of risk factors/ eye (mean) | 2.46 | 2.55 |  |
| Abbreviations: y, years; SD, standard deviation; m, months  Notes: P-values are for Student’s t-test | | | |

**Table S2. Summary of surgical outcomes of single and dual site of intrascleral haptic fixation**

| Site of intrascleral haptic fixation | After surgery | Single | Dual | P value |
| --- | --- | --- | --- | --- |
|  | (n=26) | (n=11) |
| CDVA (logMAR)　(mean ± SD) |  |  |  |  |
| Preoperative |  | 0.57±0.70 | 1.18±0.92 | 0.040 |
| Postoperative | (at last visit) | 0.15±0.32*** | 0.33±0.54*** | 0.332 |
| Endothelial cell density, cells/mm2 (mean ± SD) | |  |  |  |
| Preoperative |  | 2406±455 | 2416±467 | 0.951 |
| Postoperative | (at 1 m) | 2211±504*** | 2145±488*** | 0.724 |
| Percent change in ECD, % (mean ± SD) | | 10.0±10.6 | 11.0±13.1 |  |
| Prediction error of the target refraction, dioptre (mean ± SD) | (at 6 mos) | -0.40±0.94 | -1.22±0.76 | 0.018＊ |
| Percent of myopic deviation, eyes (%) | | 19 (73.1%) | 10 (90.0%) |  |
| Tilting of IOL, degree (mean ± SD) | (at 6 mos) | 6.75±3.13 | 6.94±3.28 | 0.875 |
|  | (at 12 mos) | 6.21±3.38 | 6.57±3.37 | 0.778 |
| Decentration of IOL, mm (mean ± SD) | (at 6 mos) | 0.61±0.32 | 0.59±0.23 | 0.811 |
|  | (at 12 mos) | 0.66±0.37 | 0.50±0.23 | 0.220 |
| Postoperative complications, eyes (%) | |  |  |  |
| Smooth vitreous haemorrhage |  | 1 (3.8) | 1 (9.1) |  |
| Transient ocular hypertension |  | 0 | 1 (9.1) |  |
| Rupture of posterior capsule |  | 1 (3.8) | 0 |  |
| Abbreviations: CDVA, corrected distance visual acuity; logMAR, logarithm of minimum angle of resolution; SD, standard deviation; m, months; ECD, endothelial cell density; IOL, intraocular lens.  Notes: *** P<0.001, Wilcoxon signed-rank test; * P<0.05, Student’s test | | | | |
